# Supplementary material for: Arthropod Ectoparasites of Two Rodent Species Occurring in Varied Elevations on Tanzania’s Second Highest Mountain
Source: MDPI journal article supplement (doi:10.3390/biology12030394), 2023-03-02
Supplement: s1 [file s1]

**Table S1.** Binomial and logit-link function model selection results for prevalence of ectoparasites of rodents on Mount Meru. Variables are host species, host sex, host density, elevation and temperature. AICc, Akaike's information criterion corrected for small sample sizes. The smallest  $\Delta\text{AICc}$  (i.e., the difference between the best and other models) is the best fitting model. Best fitting model is shown in **bold**.

| S.no     | Model                                                           | AICc          | $\Delta\text{AICc}$ |
|----------|-----------------------------------------------------------------|---------------|---------------------|
| <b>1</b> | <b>Prevalence ~ Host species + Host sex + Temperature</b>       | <b>377.04</b> | <b>0</b>            |
| 2        | Prevalence ~ Host species + Host sex + Host density+Temperature | 382.65        | 5.61                |
| 3        | Prevalence ~ Host density + Host sex                            | 382.97        | 5.93                |
| 4        | Prevalence ~ Host sex + Host density + Temperature              | 387.1         | 10.06               |
| 5        | Prevalence ~ Host species + Host sex                            | 397.66        | 20.62               |
| 6        | Prevalence ~ Host species + Host sex + Host density             | 399.05        | 22.01               |
| 7        | Prevalence ~ Host species + Host sex + Host density + Elevation | 412.55        | 35.51               |
| 8        | Prevalence ~ Host sex                                           | 422.87        | 45.83               |
| 9        | Prevalence ~ Elevation + Host species + Host density            | 514.22        | 137.18              |
| 10       | Prevalence ~ Host species                                       | 516.19        | 139.15              |
| 11       | Prevalence ~ Host density + Host species                        | 516.74        | 139.7               |
| 12       | Prevalence ~ Temperature                                        | 517.29        | 140.25              |
| 13       | Prevalence ~ Host density + Temperature                         | 522.96        | 145.92              |
| 14       | Prevalence ~ Elevation                                          | 524.07        | 147.03              |
| 15       | Prevalence ~Host density                                        | 525.82        | 148.78              |

**Table S2.** Zero-inflated model selection results for the ectoparasite abundance of rodents in the Mount Meru. Variables are host species, host sex, host density, elevation and temperature. AICc, Akaike's information criterion corrected for small sample sizes. The smallest  $\Delta\text{AICc}$  (i.e., the difference between the best and other models) is the best fitting model. Best fitting model is shown in **bold**.

|    | Model                                                            | AICc          | $\Delta\text{AICc}$ |
|----|------------------------------------------------------------------|---------------|---------------------|
| 1  | <b>Abundance ~ Host species + Host sex + Temperature</b>         | <b>814.90</b> | <b>0</b>            |
| 2  | Abundance ~ Host species + Host sex                              | 816.95        | 2.05                |
| 3  | Abundance ~ Host species + Host sex + Host density               | 819.99        | 5.09                |
| 4  | Abundance ~ Host species + Host sex + Host density + Temperature | 824.61        | 9.71                |
| 5  | Abundance ~ Host sex + Host density + Temperature                | 827.44        | 12.54               |
| 6  | Abundance ~ Host density + Host sex                              | 829.49        | 14.59               |
| 7  | Abundance ~ Host sex                                             | 831.68        | 16.78               |
| 8  | Abundance ~ Host species                                         | 889.61        | 74.71               |
| 9  | Abundance ~ Host density + Host species                          | 892.79        | 77.89               |
| 10 | Abundance ~ Temperature                                          | 893.90        | 79                  |
| 11 | Abundance ~ Host species + Host sex + Host density + Elevation   | 895.97        | 81.07               |
| 12 | Abundance ~ Host density + Temperature                           | 896.70        | 81.8                |
| 13 | Abundance ~ Elevation + Host species + Host density              | 897.15        | 82.25               |
| 14 | Abundance ~ Host density                                         | 898.29        | 83.39               |
| 15 | Abundance ~ Elevation                                            | 899.61        | 84.71               |
